# Supplementary material for: Genetic Nrf2 Overactivation Inhibits the Deleterious Effects Induced by Hepatocyte‐Specific c‐met Deletion during the Progression of NASH
Source: Hindawi journal article supplement (doi:10.1155/2017/3420286), 2017-01-01

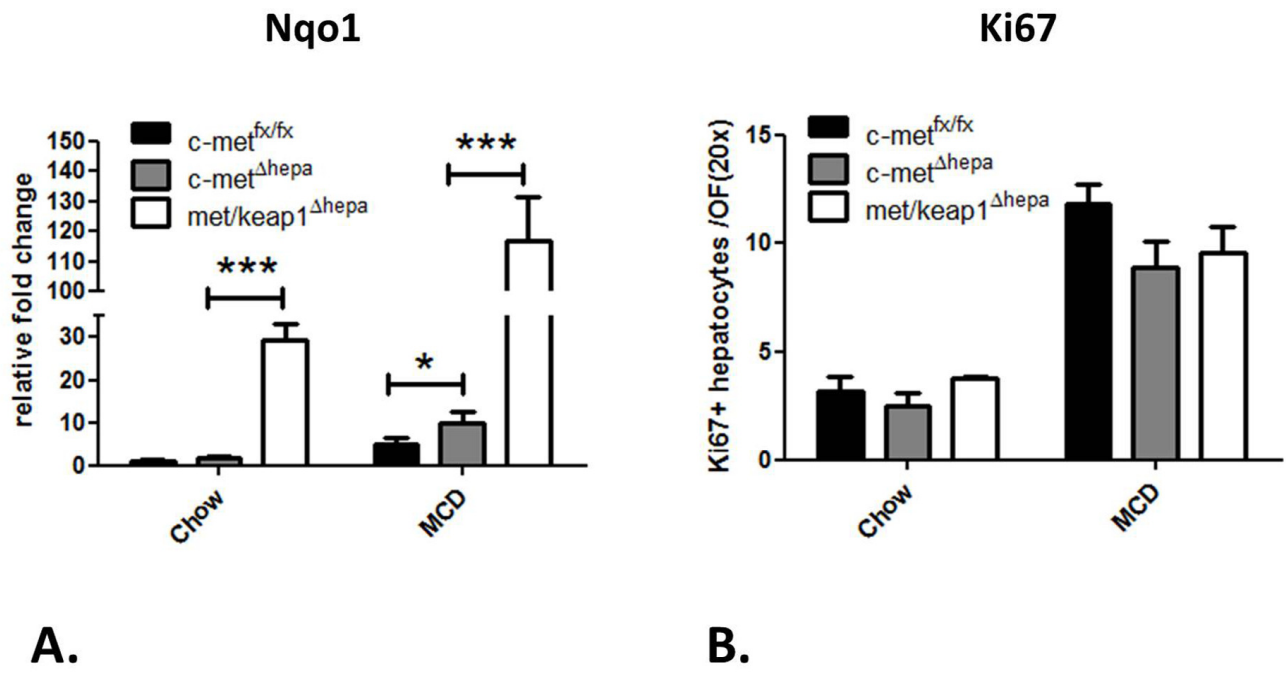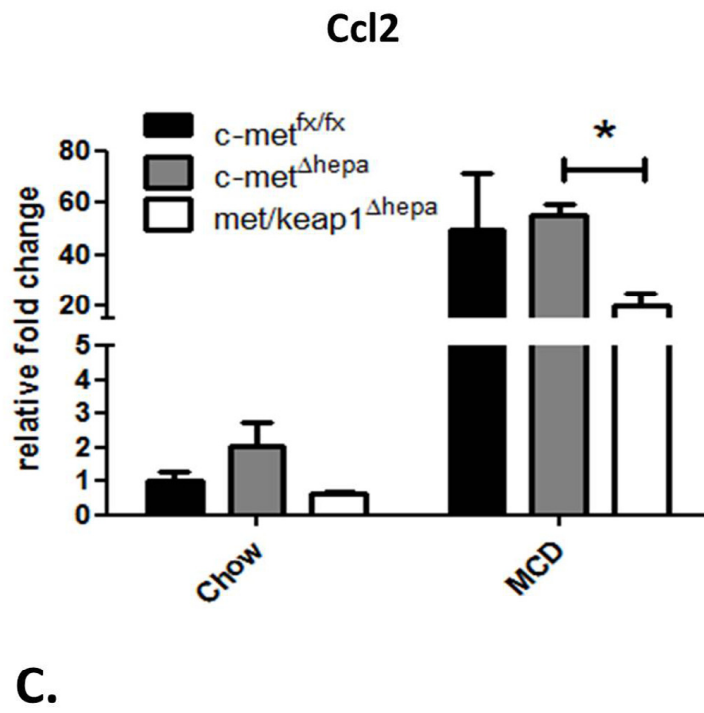

Lymphoid gating from liver FACS analysis **Suppl. Figure 2**

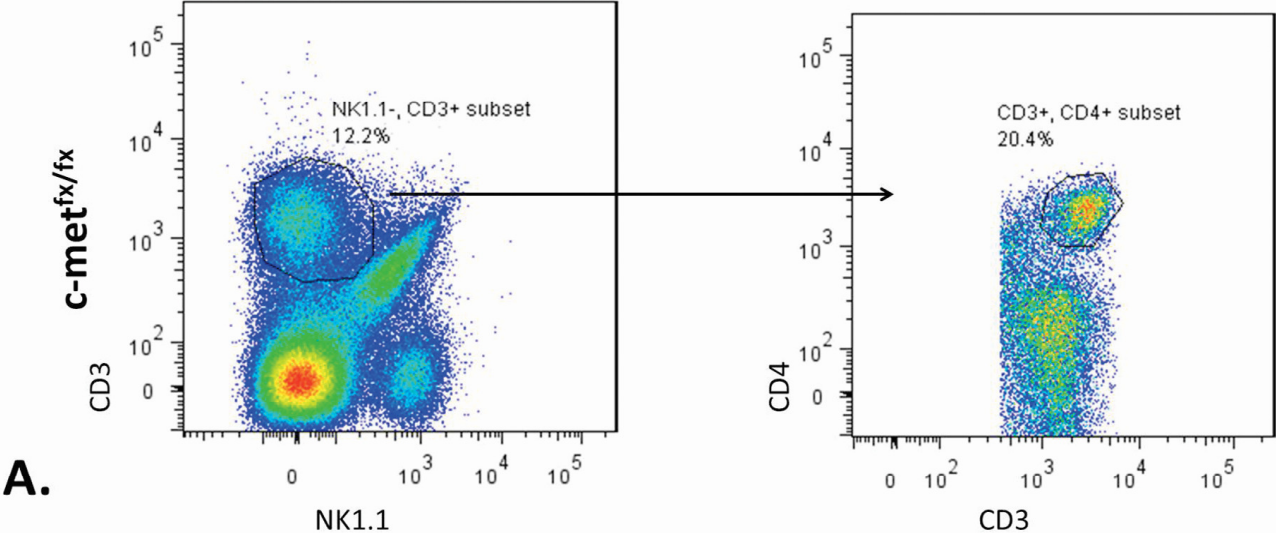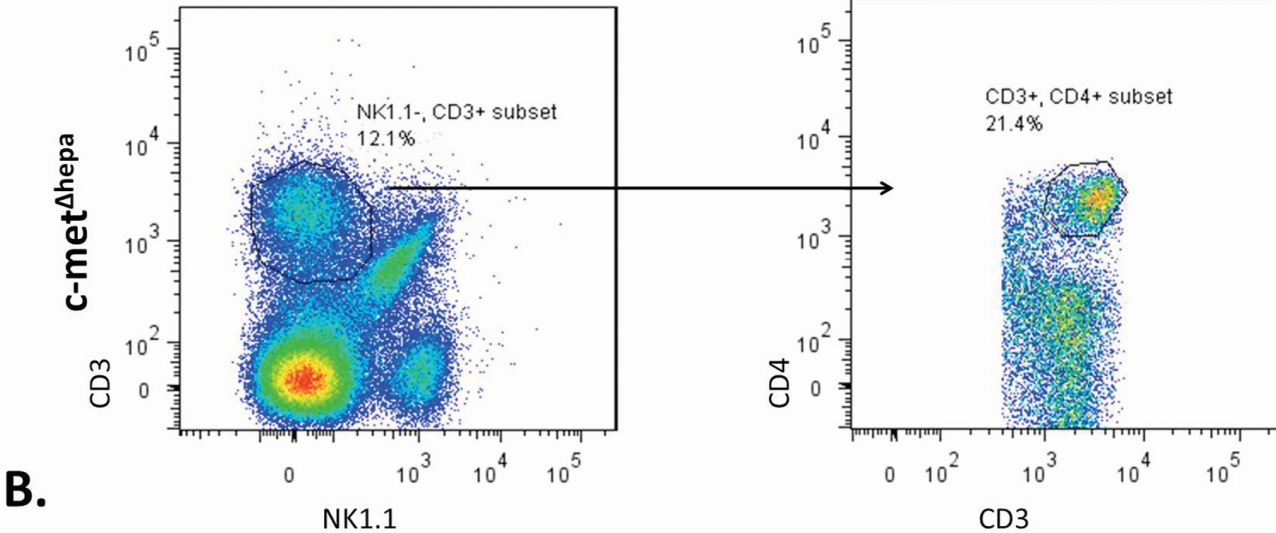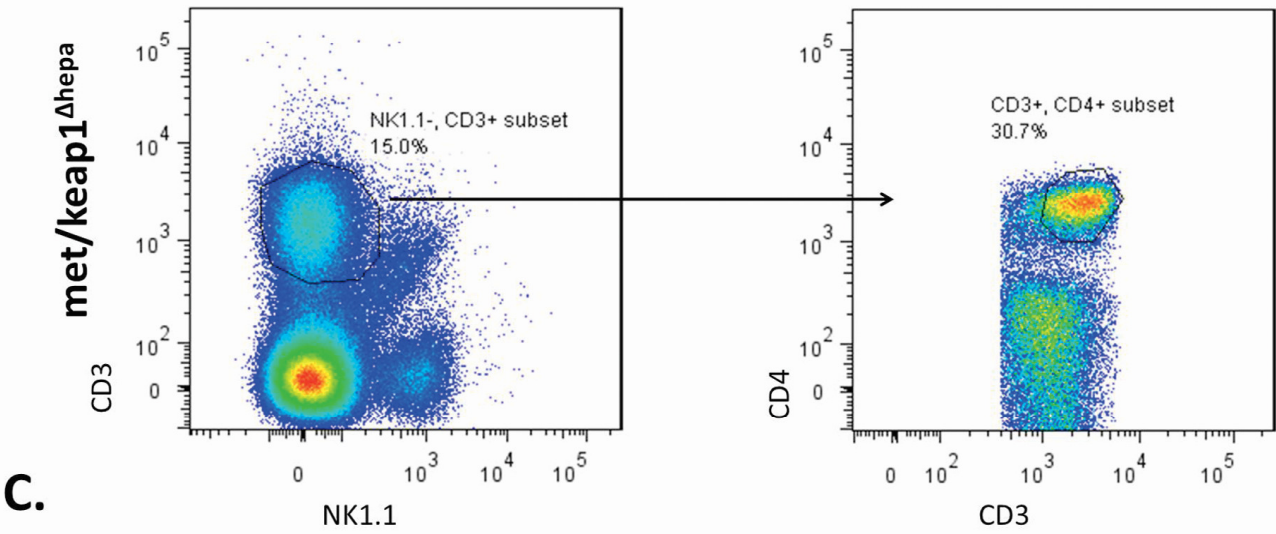

## Liver FACS

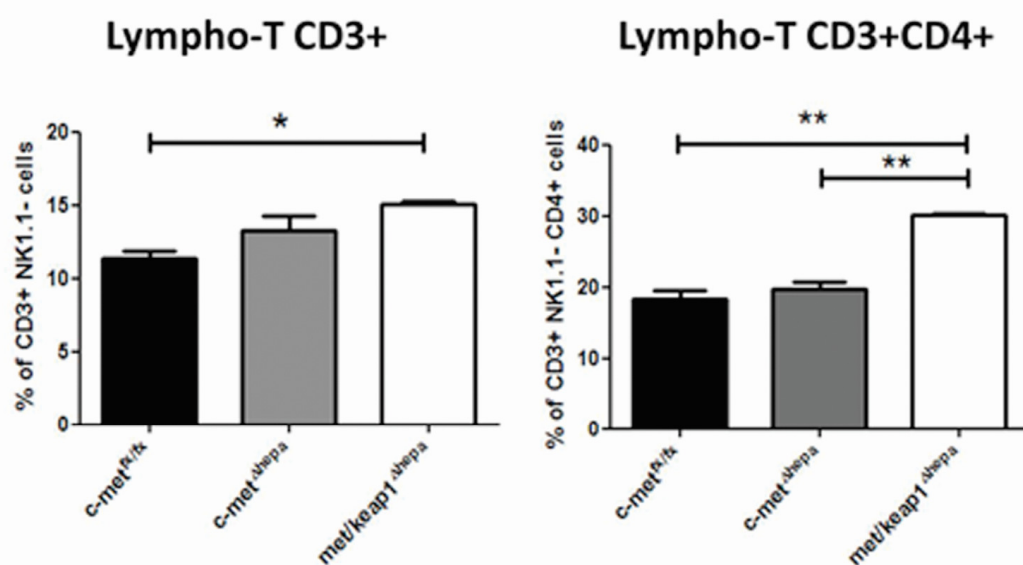

A.

## Blood FACS

## Neutrophils

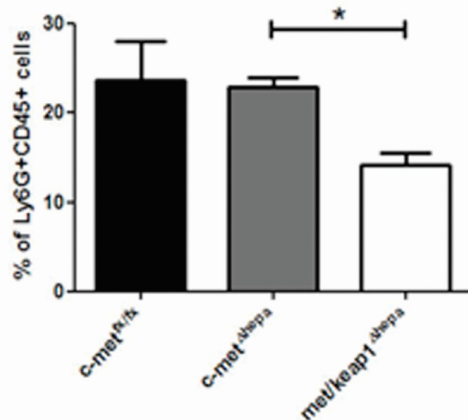

## Macrophages

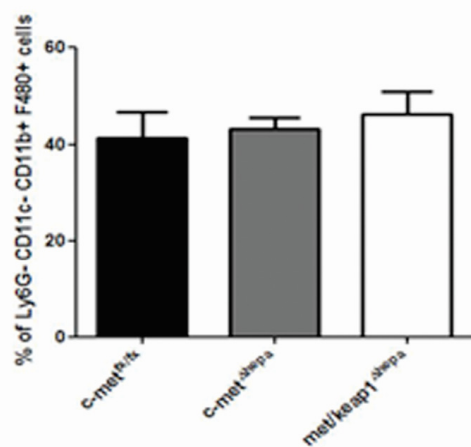

## Monocytes

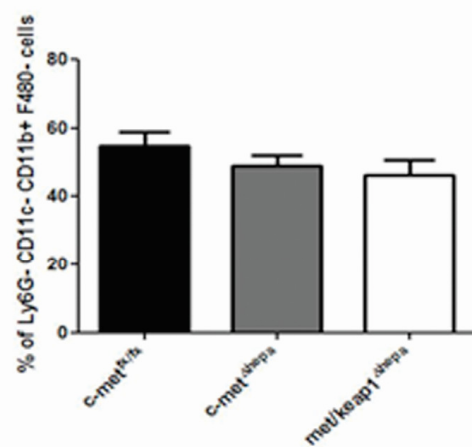

B.

Suppl. Figure 4

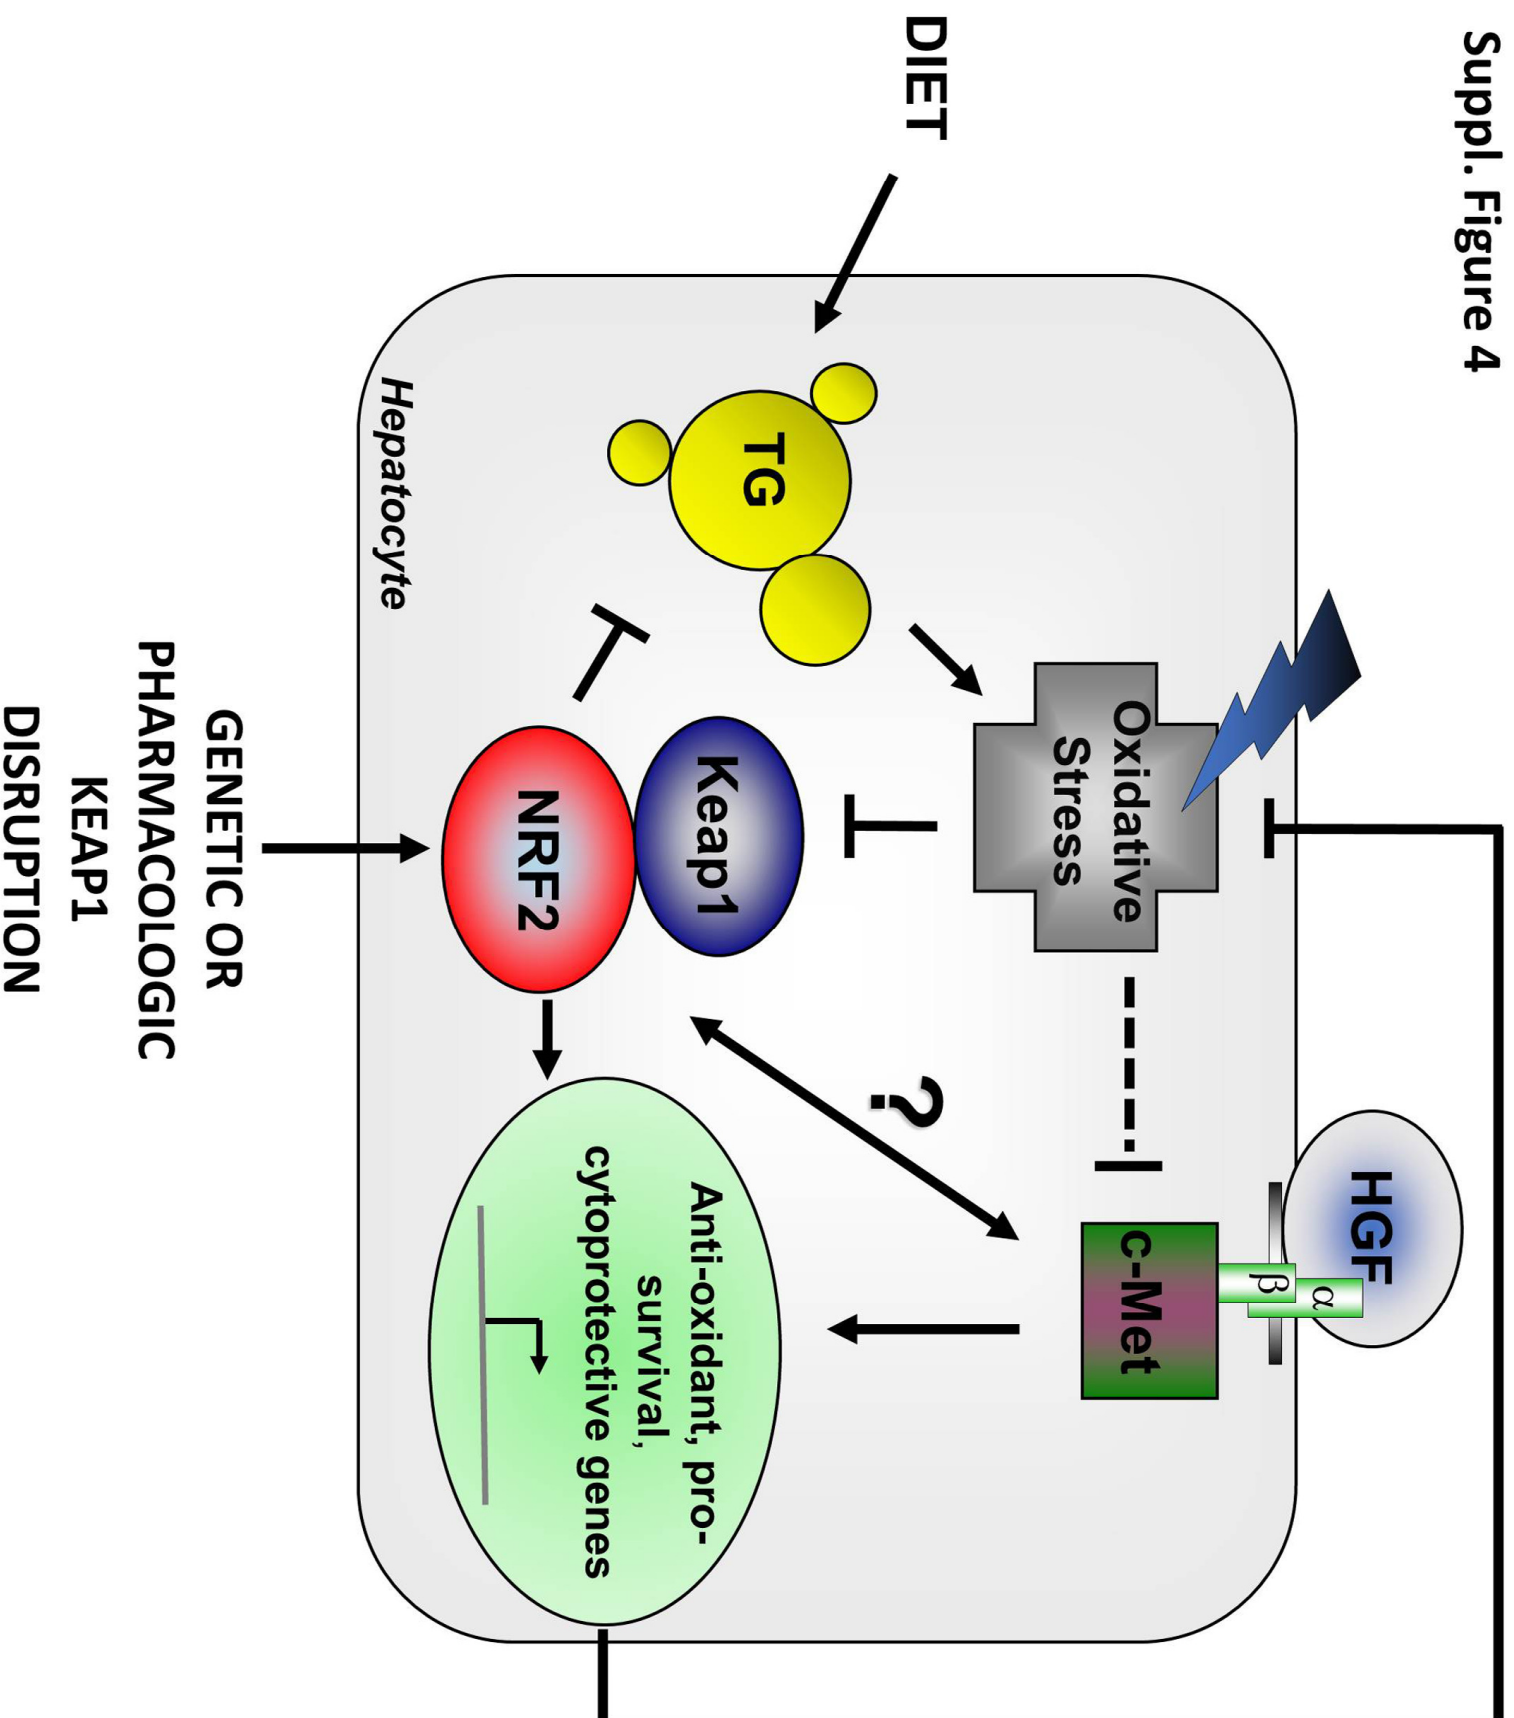

Supplement: f1 [file 3420286.f1.pdf]
